# Supplementary material for: Adsorption characteristics of a clinoptilolite-rich zeolite compound for Sr and Cs
Source: Springer Nature journal article supplement (doi:10.1007/s10967-018-6096-6), 2018-08-22

Absorbed Cs by competing ions

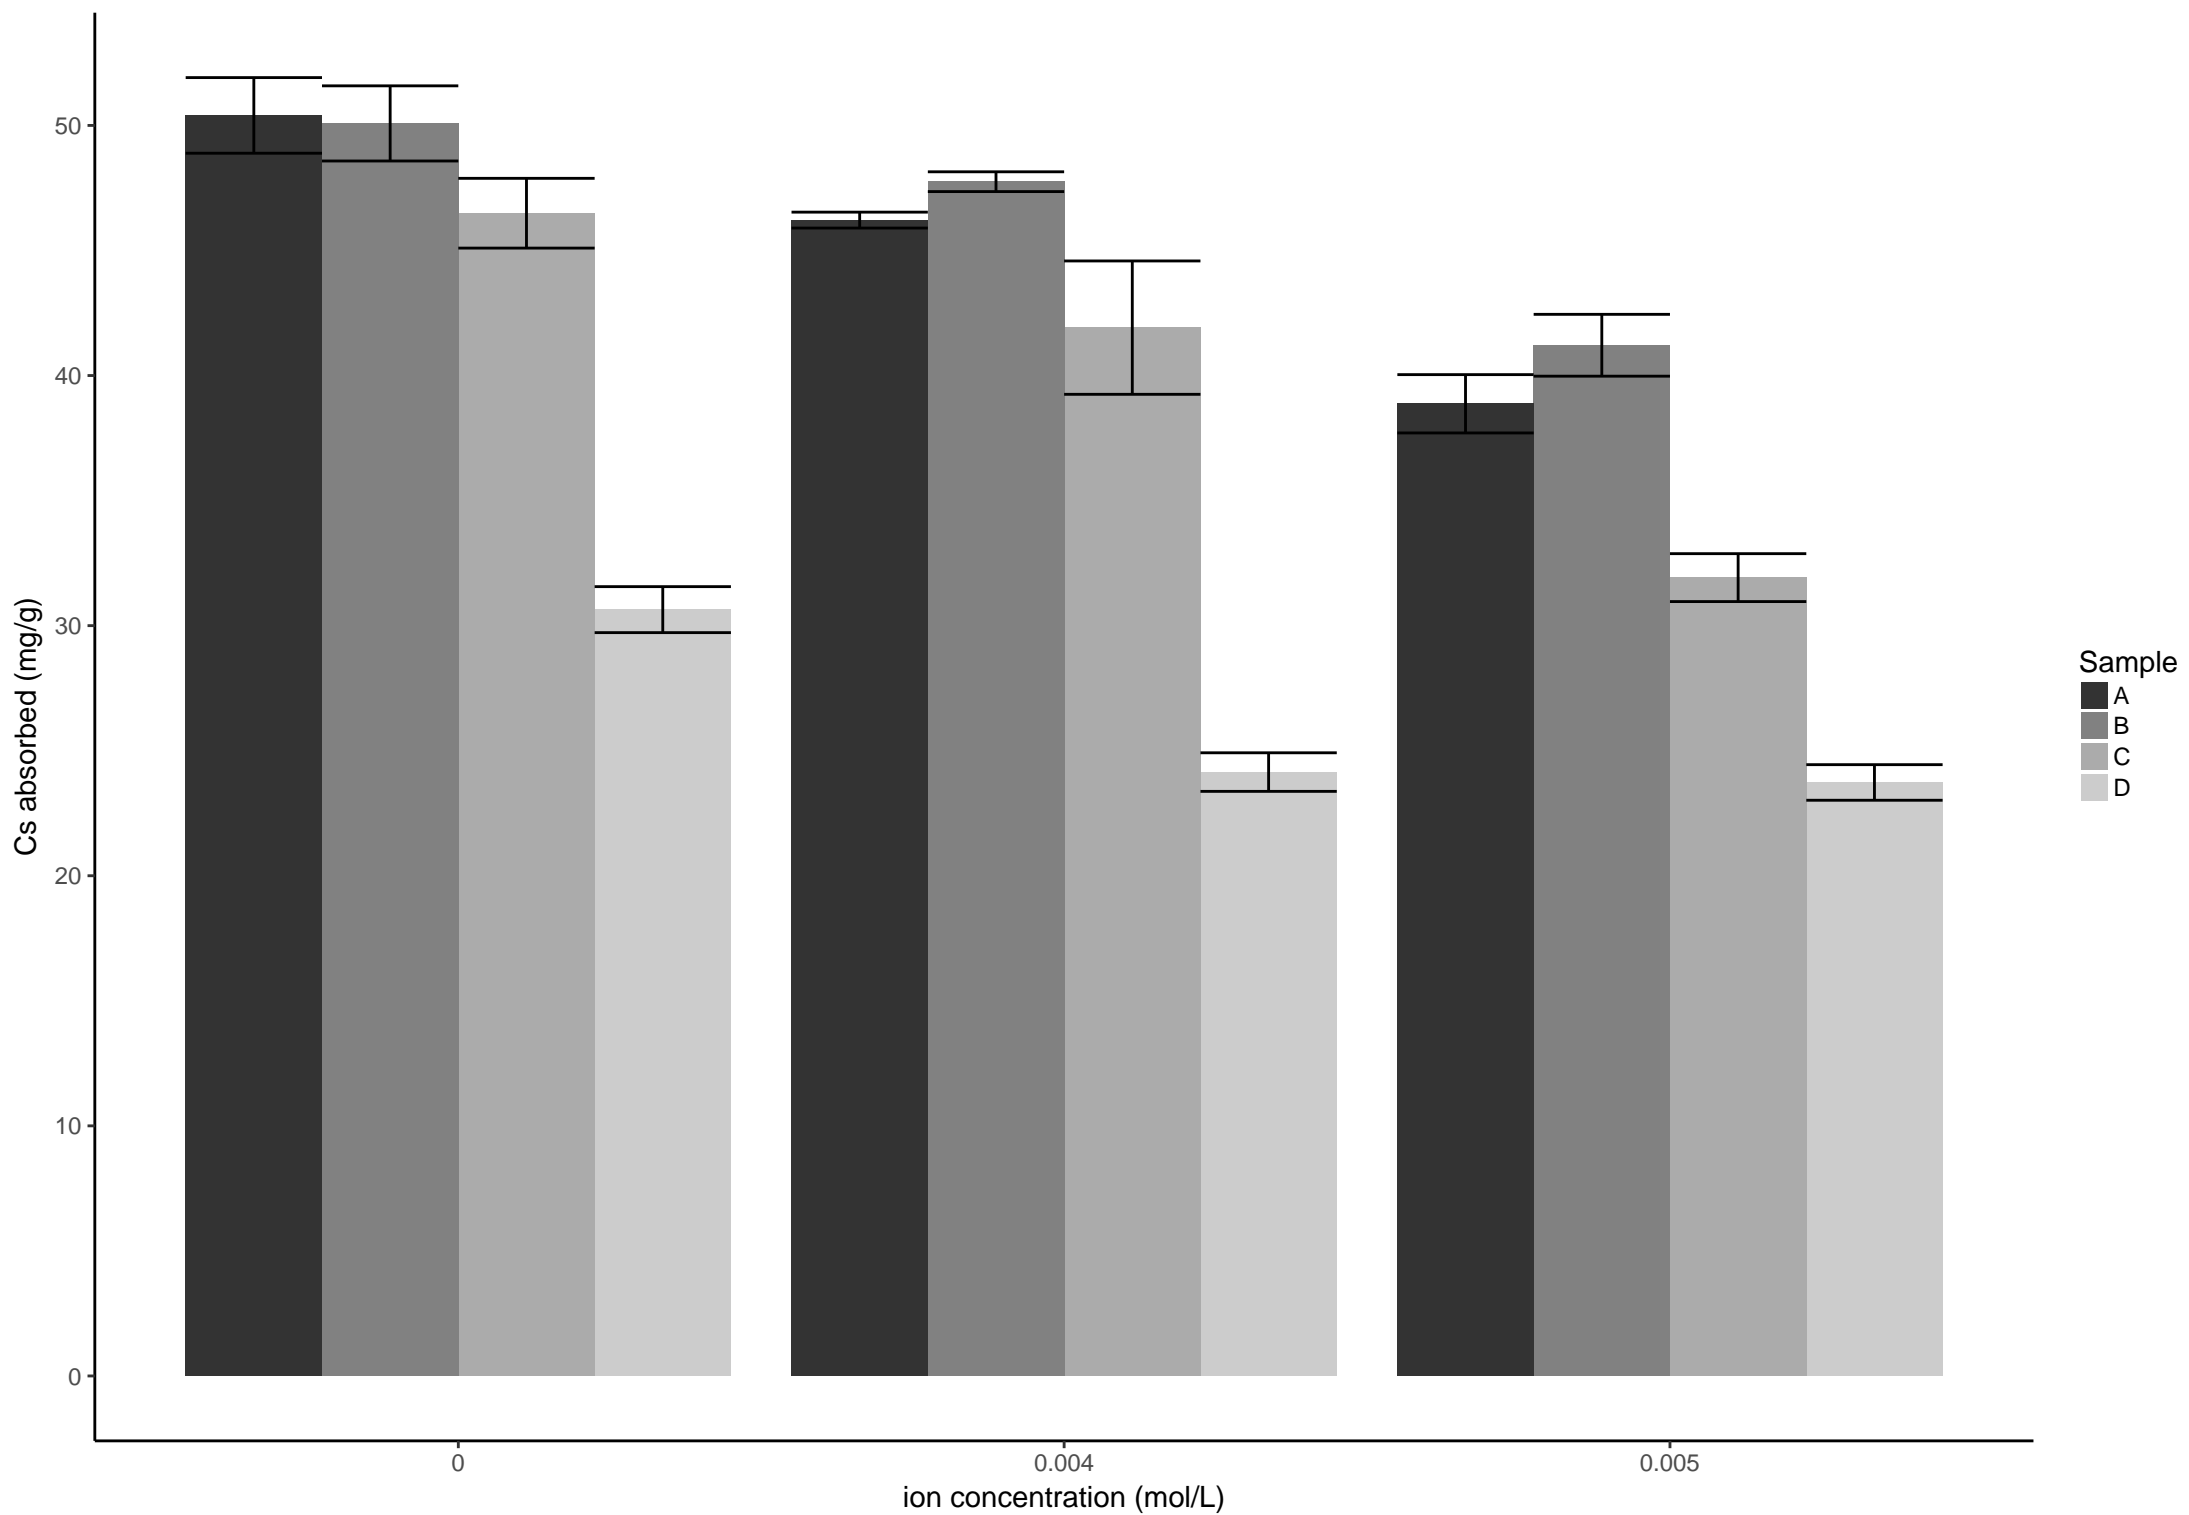

Supplement: MOESM5 [file 10967_2018_6096_MOESM5_ESM.pdf]
